# Supplementary material for: Ultrasmall functional ZnO2 nanoparticles: synthesis, characterization and oxygen release properties
Source: Royal Society of Chemistry journal article supplement (doi:10.1039/c6ra16009c), 2016-01-01

## Supporting information

Nanoparticle size determination via TEM images; unit [nm]

| cou<br>nt | ZnO <sub>2</sub> /BMEP<br>(1/1)_5c_2<br>min | ZnO <sub>2</sub> /BMEP<br>(1/1)_10c_4.5<br>min | ZnO <sub>2</sub> /BMEP<br>(1/1)_20c_9<br>min | ZnO <sub>2</sub> /BMEP<br>(1/1)_30c_13<br>min | ZnO <sub>2</sub> /BMEP<br>(5/1)_20c_9<br>min | ZnO <sub>2</sub> /BMEP<br>(10/1)_20c_9<br>min |
|-----------|---------------------------------------------|------------------------------------------------|----------------------------------------------|-----------------------------------------------|----------------------------------------------|-----------------------------------------------|
| 1         | 20.921                                      | 5.372                                          | 6,25                                         | 20.408                                        | 3,49                                         | 14,16                                         |
| 2         | 10.363                                      | 4.514                                          | 6,25                                         | 19.140                                        | 2,44                                         | 9,44                                          |
| 3         | 12.047                                      | 4.202                                          | 7,81                                         | 17.015                                        | 4,54                                         | 11,33                                         |
| 4         | 6.815                                       | 3.881                                          | 6,25                                         | 8.794                                         | 3,49                                         | 12,27                                         |
| 5         | 8.918                                       | 3.398                                          | 5,47                                         | 5.263                                         | 3,49                                         | 14,16                                         |
| 6         | 7.188                                       | 5.016                                          | 9,37                                         | 18.515                                        | 3,49                                         | 9,44                                          |
| 7         | 7.770                                       | 4.196                                          | 5,47                                         | 19.208                                        | 2,44                                         | 9,44                                          |
| 8         | 4.634                                       | 3.223                                          | 10,15                                        | 18.130                                        | 5,23                                         | 18,88                                         |
| 9         | 9.905                                       | 3.940                                          | 6,25                                         | 7.372                                         | 3,49                                         | 9,44                                          |
| 10        | 7.770                                       | 4.738                                          | 7,81                                         | 8.082                                         | 4,19                                         | 9,44                                          |
| 11        | 4.443                                       | 4.298                                          | 3,90                                         | 8.242                                         | 3,49                                         | 11,33                                         |
| 12        | 3.407                                       | 2.903                                          | 6,25                                         | 18.529                                        | 4,19                                         | 14,16                                         |
| 13        | 8.885                                       | 3.132                                          | 7,81                                         | 14.239                                        | 3,49                                         | 12,27                                         |
| 14        | 8.206                                       | 2.508                                          | 10,15                                        | 13.032                                        | 3,49                                         | 12,27                                         |
| 15        | 4.819                                       | 4.565                                          | 5,47                                         | 14.203                                        | 5,93                                         | 9,44                                          |
| 16        | 5.387                                       | 4.147                                          | 7,81                                         | 17.137                                        | 3,49                                         | 14,16                                         |
| 17        | 6.095                                       | 4.533                                          | 7,81                                         | 9.398                                         | 5,23                                         | 18,88                                         |
| 18        | 4.103                                       | 5.546                                          | 7,81                                         | 10.747                                        | 4,19                                         | 6,61                                          |
| 19        | 4.459                                       | 6.063                                          | 9,37                                         | 12.031                                        | 3,49                                         | 9,44                                          |
| 20        | 5.333                                       | 4.864                                          | 9,37                                         | 18.975                                        | 4,19                                         | 14,16                                         |
| 21        | 1.942                                       | 2.812                                          | 11,71                                        | 14.239                                        | 2,44                                         | 18,88                                         |
| 22        | 2.773                                       | 4.738                                          | 6,25                                         | 19.464                                        | 4,19                                         | 14,16                                         |
| 23        | 6.750                                       | 2.893                                          | 5,47                                         | 8.242                                         | 4,19                                         | 14,16                                         |
| 24        | 4.344                                       | 2.414                                          | 9,37                                         | 5.828                                         | 4,54                                         | 18,88                                         |
| 25        | 5.111                                       | 3.571                                          | 7,81                                         | 10.350                                        | 4,19                                         | 12,27                                         |
| 26        | 7.248                                       | 2.739                                          | 7,81                                         | 14.548                                        | 3,49                                         | 14,16                                         |
| 27        | 5.347                                       | 5.108                                          | 5,47                                         | 12.353                                        | 3,49                                         | 11,33                                         |
| 28        | 3.512                                       | 4.298                                          | 6,25                                         | 11.656                                        | 4,54                                         | 9,44                                          |
| 29        | 3.429                                       | 4.533                                          | 7,81                                         | 11.679                                        | 2,79                                         | 11,33                                         |
| 30        | 6.993                                       | 3.571                                          | 6,25                                         | 15.249                                        | 5,23                                         | 18,88                                         |
| 31        | 8.179                                       | 3.998                                          | 11,71                                        | 12.931                                        | 2,44                                         | 14,16                                         |
| 32        | 7.954                                       | 3.799                                          | 10,15                                        | 13.886                                        | 5,93                                         | 11,33                                         |
| 33        | 5.714                                       | 4.864                                          | 10,15                                        | 13.886                                        | 2,44                                         | 12,27                                         |
| 34        | 5.727                                       | 3.977                                          | 9,37                                         | 22.328                                        | 4,54                                         | 6,61                                          |
| 35        | 6.868                                       | 3.010                                          | 13,27                                        | 16.689                                        | 3,49                                         | 12,27                                         |
| 36        | 7.238                                       | 2.903                                          | 7,81                                         | 10.525                                        | 3,49                                         | 14,16                                         |
| 37        | 3.752                                       | 3.346                                          | 5,47                                         | 8.461                                         | 2,44                                         | 14,16                                         |
| 38        | 2.667                                       | 4.084                                          | 6,25                                         | 16.164                                        | 5,23                                         | 11,33                                         |
| 39        | 6.868                                       | 3.398                                          | 6,25                                         | 15.094                                        | 4,54                                         | 18,88                                         |
| 40        | 3.512                                       | 4.565                                          | 7,81                                         | 15.521                                        | 4,19                                         | 6,61                                          |
| 41        | 3.071                                       | 4.257                                          | 5,47                                         | 22.456                                        | 5,23                                         | 16,05                                         |
| 42        | 3.810                                       | 4.331                                          | 10,15                                        | 11.034                                        | 4,54                                         | 14,16                                         |
| 43        | 7.004                                       | 4.738                                          | 3,90                                         | 19.731                                        | 4,19                                         | 14,16                                         |
| 44        | 3.071                                       | 3.077                                          | 3,90                                         | 19.731                                        | 4,19                                         | 16,05                                         |
| 45        | 3.141                                       | 4.621                                          | 6,25                                         | 21.076                                        | 2,79                                         | 16,05                                         |
| 46        | 5.333                                       | 4.084                                          | 6,25                                         | 15.920                                        | 3,49                                         | 11,33                                         |

|    |       |       |       |        |      |       |
|----|-------|-------|-------|--------|------|-------|
| 47 | 3.752 | 2.175 | 7,81  | 14.832 | 3,49 | 9,44  |
| 48 | 3.512 | 3.962 | 9,37  | 11.856 | 3,49 | 12,27 |
| 49 | 3.048 | 3.268 | 5,47  | 9.832  | 4,19 | 9,44  |
| 50 | 1.616 | 3.962 | 5,47  | 11.656 | 3,49 | 9,44  |
| 51 | 5.454 | 6.078 | 5,47  | 18.072 | 4,88 | 9,44  |
| 52 | 4.587 | 2.266 | 7,81  | 20.472 | 4,88 | 11,33 |
| 53 | 7.357 | 3.911 | 5,47  | 12.645 | 6,28 | 7,55  |
| 54 | 6.306 | 3.604 | 6,25  | 8.461  | 3,49 | 4,72  |
| 55 | 8.206 | 4.250 | 7,81  | 14.258 | 2,79 | 9,44  |
| 56 | 6.510 | 3.737 | 5,47  | 13.716 | 5,58 | 6,61  |
| 57 | 4.259 | 3.268 | 5,47  | 20.675 | 4,19 | 14,16 |
| 58 | 4.259 | 4.769 | 6,25  | 10.223 | 4,54 | 17,00 |
| 59 | 5.765 | 3.398 | 5,47  | 15.854 | 3,49 | 5,67  |
| 60 | 4.587 | 5.175 | 6,25  | 16.938 | 4,19 | 9,44  |
| 61 | 5.454 | 3.010 | 6,25  | 10.223 | 3,49 | 3,78  |
| 62 | 5.181 | 4.384 | 6,25  | 23.053 | 2,09 | 19,83 |
| 63 | 3.512 | 3.372 | 6,25  | 17.898 | 3,49 | 15,11 |
| 64 | 3.614 | 4.331 | 3,90  | 5.828  | 2,44 | 10,39 |
| 65 | 4.443 | 3.132 | 6,25  | 13.886 | 3,14 | 4,72  |
| 66 | 3.614 | 3.799 | 6,25  | 16.938 | 2,44 | 11,33 |
| 67 | 3.429 | 4.410 | 3,90  | 12.789 | 2,44 | 9,44  |
| 68 | 4.967 | 4.621 | 7,81  | 16.051 | 3,14 | 16,05 |
| 69 | 5.083 | 5.670 | 3,90  | 16.938 | 2,79 | 8,50  |
| 70 | 3.614 | 4.835 | 7,81  | 19.994 | 2,44 | 10,39 |
| 71 | 3.141 | 4.196 | 7,81  | 9.832  | 3,49 | 10,39 |
| 72 | 4.121 | 4.410 | 10,15 | 17.648 | 3,14 | 5,67  |
| 73 | 3.752 | 3.346 | 5,47  | 16.861 | 3,49 | 9,44  |
| 74 | 6.554 | 3.440 | 3,90  | 14.903 | 3,84 | 13,22 |
| 75 | 6.023 | 4.864 | 7,81  | 19.994 | 3,49 | 15,11 |
| 76 | 6.143 | 3.675 | 3,90  | 7.819  | 2,09 | 16,05 |
| 77 | 5.827 | 3.874 | 5,47  | 20.370 | 2,09 | 12,27 |
| 78 | 4.819 | 3.874 | 5,47  | 15.920 | 2,79 | 4,72  |
| 79 | 4.344 | 3.760 | 6,25  | 12.031 | 1,74 | 14,16 |
| 80 | 5.454 | 3.465 | 9,37  | 18.430 | 1,40 | 12,27 |
| 81 | 5.292 | 7.143 | 10,15 | 19.451 | 2,79 | 11,33 |
| 82 | 2.694 | 4.331 | 9,37  | 21.347 | 3,49 | 9,44  |
| 83 | 2.667 | 4.953 | 6,25  | 12.289 | 3,14 | 18,88 |
| 84 | 5.926 | 5.776 | 3,90  | 9.398  | 4,54 | 8,50  |
| 85 | 2.439 | 5.247 | 7,81  | 17.364 | 2,79 | 9,44  |
| 86 | 3.232 | 3.039 | 6,25  | 23.954 | 3,14 | 9,44  |
| 87 | 4.650 | 2.686 | 7,81  | 13.735 | 3,14 | 14,16 |
| 88 | 6.510 | 7.597 | 3,90  | 19.016 | 3,14 | 7,55  |
| 89 | 4.571 | 4.430 | 6,25  | 21.986 | 2,44 | 17,00 |
| 90 | 5.011 | 4.811 | 5,47  | 10.120 | 2,09 | 11,33 |
| 91 | 3.429 | 4.571 | 5,47  | 11.656 | 2,44 | 16,05 |
| 92 | 3.512 | 3.962 | 6,25  | 21.113 | 2,79 | 7,55  |
| 93 | 3.429 | 4.430 | 7,81  | 16.164 | 2,09 | 4,72  |
| 94 | 8.390 | 3.874 | 6,25  | 15.920 | 3,49 | 4,72  |
| 95 | 8.695 | 4.331 | 5,47  | 15.572 | 3,84 | 6,61  |
| 96 | 5.963 | 5.291 | 7,81  | 14.258 | 2,09 | 11,33 |
| 97 | 7.157 | 3.363 | 6,25  | 13.639 | 3,49 | 14,16 |
| 98 | 9.712 | 5.141 | 9,37  | 7.786  | 2,44 | 10,39 |
| 99 | 8.893 | 5.399 | 7,81  | 22.688 | 2,44 | 11,33 |

|     |       |       |       |        |      |       |
|-----|-------|-------|-------|--------|------|-------|
| 100 | 3.071 | 3.414 | 7,81  | 19.531 | 4,19 | 6,61  |
| 101 | 3.232 | 3.268 | 7,81  | 14.885 | 4,54 | 8,50  |
| 102 | 4.571 | 3.123 | 9,37  | 5.783  | 3,84 | 7,55  |
| 103 | 7.954 | 4.953 | 10,15 | 12.479 | 2,44 | 12,27 |
| 104 | 3.885 |       | 7,81  | 22.021 | 5,23 | 15,11 |
| 105 | 4.459 |       | 7,81  | 20.675 | 2,79 | 10,39 |
| 106 | 2.747 |       | 11,71 | 14.832 | 3,49 | 10,39 |
| 107 | 3.752 |       | 9,37  | 14.258 | 3,49 | 8,50  |
| 108 | 3.614 |       | 7,81  |        | 4,19 | 12,27 |
| 109 | 3.922 |       | 10,15 |        | 3,14 | 6,61  |
| 110 | 3.771 |       | 7,81  |        | 3,14 | 10,39 |
| 111 | 4.603 |       | 7,81  |        | 3,49 | 10,39 |
| 112 | 4.819 |       | 10,15 |        | 3,14 | 10,39 |
| 113 | 3.752 |       | 7,81  |        | 2,79 | 17,00 |
| 114 | 4.344 |       | 5,47  |        | 3,14 | 17,00 |
| 115 | 4.650 |       | 9,37  |        | 5,23 | 12,27 |
| 116 |       |       | 10,15 |        | 3,84 | 10,39 |
| 117 |       |       | 9,37  |        | 3,49 | 8,50  |
| 118 |       |       | 10,15 |        | 3,49 | 15,11 |
| 119 |       |       | 7,81  |        | 3,14 | 12,27 |
| 120 |       |       | 9,37  |        | 4,19 | 8,50  |
| 121 |       |       | 7,81  |        | 3,84 | 9,44  |
| 122 |       |       | 9,37  |        | 3,49 | 12,27 |
| 123 |       |       | 7,81  |        | 3,14 | 6,61  |
| 124 |       |       | 5,47  |        | 3,84 | 16,05 |
| 125 |       |       | 6,25  |        | 4,19 | 10,39 |
| 126 |       |       | 7,81  |        | 2,09 | 14,16 |
| 127 |       |       | 10,15 |        | 2,44 | 10,39 |
| 128 |       |       | 7,81  |        | 2,79 | 5,67  |
| 129 |       |       | 6,25  |        | 3,14 | 14,16 |
| 130 |       |       | 5,47  |        | 3,49 | 7,55  |
| 131 |       |       | 7,81  |        | 2,79 | 6,61  |
| 132 |       |       | 7,81  |        | 3,49 | 9,44  |
| 133 |       |       | 5,47  |        | 2,44 | 16,05 |
| 134 |       |       | 3,90  |        | 3,14 | 15,11 |
| 135 |       |       | 11,71 |        | 3,49 | 12,27 |
| 136 |       |       | 3,90  |        | 2,09 | 8,50  |
| 137 |       |       | 7,81  |        | 1,40 | 10,39 |
| 138 |       |       | 7,81  |        | 2,44 | 7,55  |
| 139 |       |       | 7,81  |        | 3,14 | 9,44  |
| 140 |       |       | 9,37  |        | 2,09 | 5,67  |
| 141 |       |       | 11,71 |        | 2,44 | 5,67  |
| 142 |       |       | 9,37  |        | 2,09 | 14,16 |
| 143 |       |       | 7,81  |        | 2,09 | 14,16 |
| 144 |       |       | 7,81  |        | 5,93 | 13,22 |
| 145 |       |       | 11,71 |        | 3,14 | 18,88 |
| 146 |       |       | 10,15 |        | 2,79 | 8,50  |
| 147 |       |       | 7,81  |        | 2,44 | 17,94 |
| 148 |       |       | 3,90  |        | 3,14 | 13,22 |
| 149 |       |       | 6,25  |        | 2,09 | 11,33 |
| 150 |       |       | 7,81  |        | 1,74 | 9,44  |

---

|     |       |      |       |
|-----|-------|------|-------|
| 151 | 5,47  | 2,09 | 16,05 |
| 152 | 6,25  | 3,84 | 18,88 |
| 153 | 7,81  | 3,49 | 12,27 |
| 154 | 7,81  | 3,14 | 14,16 |
| 155 | 9,37  | 2,44 | 14,16 |
| 156 | 10,15 | 2,09 | 19,83 |
| 157 | 11,71 | 2,44 | 16,05 |
| 158 | 5,47  | 2,79 | 10,39 |
| 159 | 6,25  | 2,79 | 7,55  |
| 160 | 6,25  | 2,79 | 10,39 |
| 161 | 6,25  | 3,49 | 7,55  |
| 162 | 7,81  | 3,49 | 10,39 |
| 163 | 5,47  | 2,79 | 9,44  |
| 164 | 3,90  | 3,14 | 7,55  |
| 165 | 3,90  | 3,14 | 17,94 |
| 166 | 6,25  | 3,49 | 16,05 |
| 167 | 11,71 | 3,49 | 6,61  |
| 168 | 6,25  | 3,84 | 9,44  |
| 169 | 3,90  | 3,14 | 8,50  |
| 170 | 7,81  | 3,49 | 8,50  |
| 171 | 3,90  | 3,14 | 15,11 |
| 172 | 7,81  | 2,09 | 12,27 |
| 173 | 6,25  | 2,79 | 10,39 |
| 174 | 5,47  | 4,88 | 15,11 |
| 175 | 7,81  | 3,14 | 19,83 |
| 176 | 5,47  | 4,88 | 10,39 |
| 177 | 7,81  | 3,14 | 12,27 |
| 178 | 7,81  | 2,44 | 10,39 |
| 179 | 3,90  | 2,09 | 14,16 |
| 180 | 5,47  | 2,79 | 14,16 |
| 181 | 7,81  | 3,49 | 14,16 |
| 182 | 7,81  | 3,14 | 11,33 |
| 183 | 7,81  | 3,84 | 14,16 |
| 184 | 6,25  | 3,14 | 11,33 |
| 185 | 6,25  | 4,19 | 10,39 |
| 186 | 5,47  | 2,44 | 10,39 |
| 187 | 3,90  | 3,84 | 12,27 |
| 188 | 3,90  | 2,79 | 13,22 |
| 189 | 3,90  | 3,49 | 7,55  |
| 190 | 3,90  | 2,44 | 12,27 |
| 191 | 7,81  | 3,84 | 7,55  |
| 192 | 9,37  | 4,19 | 7,55  |
| 193 | 3,90  | 3,14 | 6,61  |
| 194 | 5,47  | 3,14 | 9,44  |
| 195 | 6,25  | 3,14 | 9,44  |
| 196 | 3,90  | 2,44 | 5,67  |
| 197 | 6,25  | 4,88 | 13,22 |
| 198 | 5,47  | 2,79 | 16,05 |
| 199 | 7,81  | 2,09 | 7,55  |
| 200 | 3,90  | 2,09 | 17,00 |
| 201 | 5,47  | 3,14 | 12,27 |

---

|     |     |     |     |      |      |     |      |
|-----|-----|-----|-----|------|------|-----|------|
| 202 |     |     |     | 5,47 |      |     |      |
| 203 |     |     |     | 5,47 |      |     |      |
| 204 |     |     |     | 5,47 |      |     |      |
| 205 |     |     |     | 5,47 |      |     |      |
| 206 |     |     |     | 3,90 |      |     |      |
| 207 |     |     |     | 5,47 |      |     |      |
| 208 |     |     |     | 6,25 |      |     |      |
| mea | 5.2 | 3.9 |     |      | 14.4 | 3.3 | 11.5 |
| n   |     |     |     | 7.0  |      |     |      |
| STD | 2.6 | 1.2 | 2.0 |      | 5.2  | 0.9 | 3.6  |

Crystallite size determination via Debye Scherrer equation and the measured parameter:

| FWHM  |                                             |                                                |                                              |                                               |                                              |                                               |
|-------|---------------------------------------------|------------------------------------------------|----------------------------------------------|-----------------------------------------------|----------------------------------------------|-----------------------------------------------|
| M     |                                             |                                                |                                              |                                               |                                              |                                               |
| [rad] |                                             |                                                |                                              |                                               |                                              |                                               |
| index | ZnO <sub>2</sub> /BMEP<br>(1/1)_5c_2<br>min | ZnO <sub>2</sub> /BMEP<br>(1/1)_10c_<br>4.5min | ZnO <sub>2</sub> /BMEP<br>(1/1)_20c_9<br>min | ZnO <sub>2</sub> /BMEP<br>(1/1)_30c_13<br>min | ZnO <sub>2</sub> /BMEP<br>(5/1)_20c_9<br>min | ZnO <sub>2</sub> /BMEP<br>(10/1)_20c_9<br>min |
| 220   | 0,06004378                                  | 0,05160067                                     | 0,05606644                                   | 0,06480611                                    | 0,06000889                                   | 0,063428                                      |
| 311   | 0,06977778                                  | 0,03888367                                     | 0,07270844                                   | 0,06928933                                    | 0,06649822                                   | 0,07181878                                    |

| angle |                                             |                                                |                                              |                                               |                                              |                                               |
|-------|---------------------------------------------|------------------------------------------------|----------------------------------------------|-----------------------------------------------|----------------------------------------------|-----------------------------------------------|
| [°]   |                                             |                                                |                                              |                                               |                                              |                                               |
| index | ZnO <sub>2</sub> /BMEP<br>(1/1)_5c_2<br>min | ZnO <sub>2</sub> /BMEP<br>(1/1)_10c_<br>4.5min | ZnO <sub>2</sub> /BMEP<br>(1/1)_20c_9<br>min | ZnO <sub>2</sub> /BMEP<br>(1/1)_30c_13<br>min | ZnO <sub>2</sub> /BMEP<br>(5/1)_20c_9<br>min | ZnO <sub>2</sub> /BMEP<br>(10/1)_20c_9<br>min |
| 220   | 26,568                                      | 26,7665                                        | 26,3695                                      | 26,772                                        | 26,7035                                      | 26,681                                        |
| 311   | 31,4695                                     | 31,5325                                        | 31,465                                       | 31,5805                                       | 31,455                                       | 31,3855                                       |

water reference measurement:

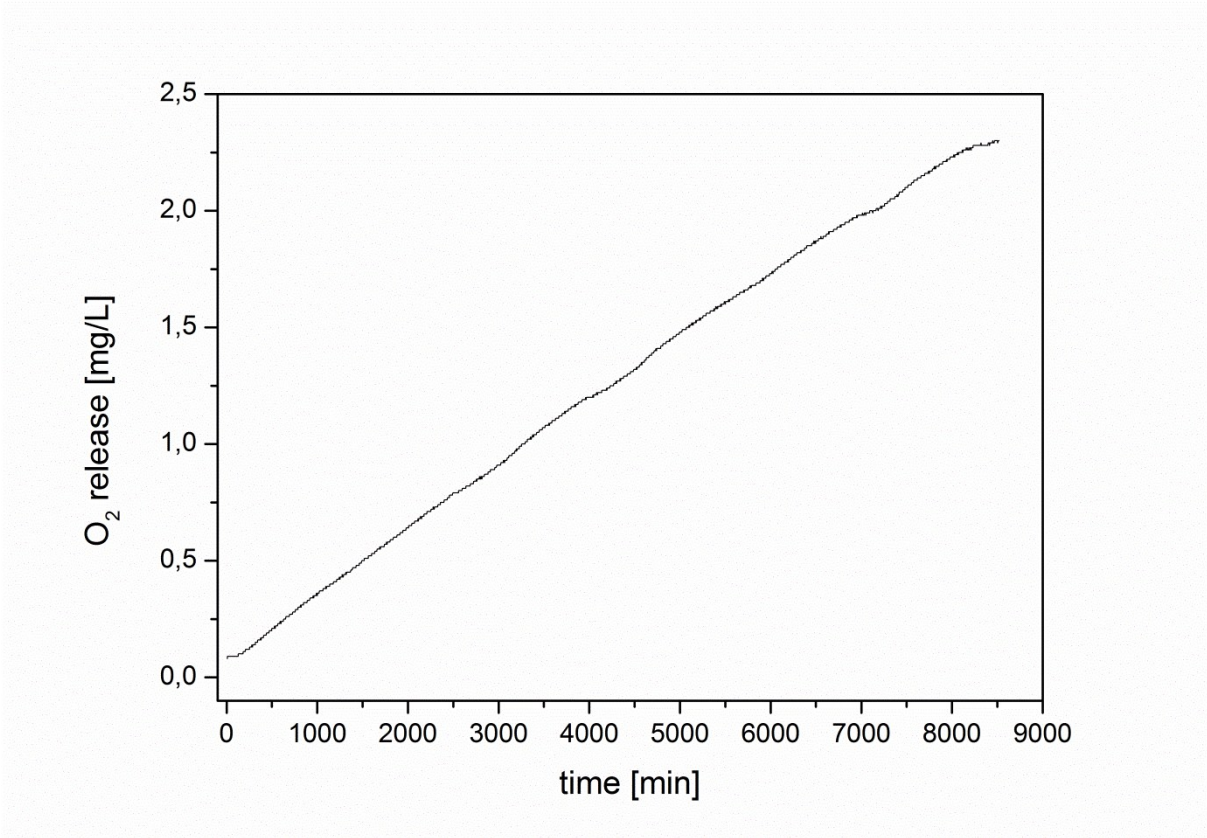

Supplement: c6ra16009c1.pdf [file c6ra16009c1.pdf]
